# Supplementary material
Source: publisher site journal article supplement (https://www.dovepress.com/article/501054)
Supplement: Supplementary file 1 [file get_supplementary_file.php]

**Appendix 1: Search Strategies**

**Database 1: PubMed**

- **Search Date:** August 22, 2024
- **Search Strategy:** ("Pulmonary Disease, Chronic Obstructive"[MeSH] OR "Chronic Obstructive Lung Disease" OR "Chronic Obstructive Pulmonary Diseases" OR COAD OR COPD OR "Chronic Obstructive Airway Disease" OR "Airflow Obstruction, Chronic" OR "Airflow Obstructions, Chronic" OR "Chronic Airflow Obstructions" OR "Chronic Airflow Obstruction") AND ("discrete-event simulation" OR "discrete event simulation" OR ("discrete event" AND "computer simulation") OR ("discrete event" AND model))

**Database 2：Web of Science**

- **Search Date:** August 22, 2024
- **Search Strategy:** TS=(Pulmonary Disease, Chronic Obstructive OR Chronic Obstructive Lung Disease OR Chronic Obstructive Pulmonary Diseases OR COAD OR COPD OR Chronic Obstructive Airway Disease OR Chronic Obstructive Pulmonary Disease OR Airflow Obstruction, Chronic OR Airflow Obstructions, Chronic OR Chronic Airflow Obstructions OR Chronic Airflow Obstruction) AND TS=(“discrete-event*”AND "simulation" OR "discrete event simulation" OR "discrete event" AND "computer simulat*" OR "discrete event" AND "model*")

**Database 3: Embase**

- **Search Date:** August 22, 2024
- **Search Strategy:** ('chronic obstructive lung disease'/exp OR 'chronic obstructive lung disease' OR 'pulmonary disease, chronic obstructive' OR 'chronic obstructive pulmonary diseases' OR coad OR copd OR 'chronic obstructive airway disease' OR 'airflow obstruction, chronic' OR 'airflow obstructions, chronic' OR 'chronic airflow obstructions' OR 'chronic airflow obstruction') AND ('discrete-event simulation' OR 'discrete event simulation' OR ('discrete event' AND 'computer simulation') OR ('discrete event' AND model))

**Database 4: Cochrane**

- **Search Date:** August 22, 2024
- **Search Strategy****:** (Pulmonary Disease, Chronic Obstructive OR Chronic Obstructive Lung Disease OR Chronic Obstructive Pulmonary Diseases OR COAD OR COPD OR Chronic Obstructive Airway Disease OR Chronic Obstructive Pulmonary Disease OR Airflow Obstruction, Chronic OR Airflow Obstructions, Chronic OR Chronic Airflow Obstructions OR Chronic Airflow Obstruction) AND ((discrete-event AND simulation) OR "discrete event simulation" OR (discrete event* AND computer simulat*) OR (discrete event* AND model*))

**Database 5: Econlit**

- **Search Date:** August 22, 2024
- **Search Strategy:** (Pulmonary Disease, Chronic Obstructive OR Chronic Obstructive Lung Disease OR Chronic Obstructive Pulmonary Diseases OR COAD OR COPD OR Chronic Obstructive Airway Disease OR Chronic Obstructive Pulmonary Disease OR Airflow Obstruction, Chronic OR Airflow Obstructions, Chronic OR Chronic Airflow Obstructions OR Chronic Airflow Obstruction) AND ((discrete-event AND simulation) OR "discrete event simulation" OR (discrete event* AND computer simulat*) OR (discrete event* AND model*))

**Database 6: CNKI**

- **Search Date:** August 22, 2024
- **Search Strategy:** (Full text:("Chronic Obstructive Pulmonary Disease" OR "Chronic Obstructive Lung Disease" OR "COPD" OR "Chronic Airflow Obstruction")) AND (Full text:("Discrete Event Simulation" OR ("Discrete Event" AND "Simulation") OR ("Discrete Event" AND "Computer Simulation") OR ("Discrete Event" AND "Model")))

**Appendix 2: Quality Assessment**

**Table S1 Assessment of the CHEERS 2022 checklist on study level**

| Study | Title | Abstract | Background and objectives | Health economic analysis plan | Study population | Setting and location | Comparators | Perspective | Time horizon | Discount rate | Selection of outcomes | Measurement of comes | Valuation of outcomes | Measurement and valuation of resources and costs | Currency, price date, and conversion | Rationale and description of model | Analytics and assumptions | Characterizing heterogeneity | Characterizing distributional effects | Characterizing uncertainty | Approach to engagement with patients and others affected by the study | Study parameters | Summary of main results | Effect of uncertainty | Effect of engagement with patients and others affected by the study | Study findings, limitations, generalizability, and current knowledge | Source of funding | Conflicts of interest | Score (%) |
| --- | --- | --- | --- | --- | --- | --- | --- | --- | --- | --- | --- | --- | --- | --- | --- | --- | --- | --- | --- | --- | --- | --- | --- | --- | --- | --- | --- | --- | --- |
| Hoogendoorn et al.(2019)27 | 1 | 1 | 1 | 0 | 1 | 1 | 1 | 1 | 1 | 1 | 1 | 1 | 1 | 1 | 1 | 1 | 1 | 1 | 0 | 1 | 0 | 1 | 1 | 1 | 0 | 1 | 1 | 1 | 85.7 |
| Hoogendoorn  et al.(2019a)34 | 1 | 1 | 1 | 0 | 1 | 1 | 1 | 1 | 1 | 1 | 1 | 1 | 1 | 1 | 1 | 1 | 1 | 0 | 0 | 1 | 0 | 1 | 1 | 1 | 0 | 1 | 1 | 1 | 82.1 |
| Hoogendoorn et al.(2021)35 | 1 | 1 | 1 | 0 | 1 | 1 | 1 | 1 | 1 | 1 | 1 | 1 | 1 | 1 | 1 | 1 | 1 | 0 | 0 | 1 | 0 | 1 | 1 | 1 | 0 | 1 | 1 | 1 | 82.1 |
| Sadatsafavi  et al.(2019)33 | 0 | 1 | 1 | 0 | 1 | 1 | 0 | 0 | 0 | 0 | 1 | 1 | 1 | 1 | 1 | 1 | 1 | 1 | 0 | 0 | 1 | 1 | 1 | 1 | 0 | 1 | 1 | 1 | 67.9 |
| Johnson  et al.(2021)31 | 1 | 1 | 1 | 0 | 1 | 1 | 1 | 1 | 1 | 1 | 1 | 1 | 1 | 1 | 1 | 1 | 1 | 0 | 0 | 1 | 1 | 1 | 1 | 1 | 0 | 1 | 1 | 1 | 85.7 |
| Yakutcan  et al.(2020)28 | 0 | 1 | 1 | 0 | 1 | 1 | 1 | 1 | 1 | 0 | 1 | 1 | 1 | 1 | 1 | 1 | 1 | 0 | 0 | 1 | 1 | 1 | 1 | 1 | 0 | 1 | 1 | 1 | 78.6 |
| Yakutcan  et al.(2021)29 | 0 | 1 | 1 | 0 | 1 | 1 | 1 | 1 | 1 | 1 | 1 | 1 | 1 | 1 | 0 | 1 | 1 | 0 | 0 | 1 | 1 | 1 | 1 | 1 | 0 | 1 | 1 | 1 | 78.6 |
| Yakutcan  et al.(2022)30 | 0 | 1 | 1 | 0 | 1 | 1 | 1 | 1 | 1 | 0 | 1 | 1 | 1 | 1 | 0 | 1 | 1 | 0 | 0 | 1 | 1 | 1 | 1 | 1 | 0 | 1 | 1 | 1 | 75.0 |

**Table S2 Assessment of Study Quality Based on ISPOR Guidelines**

| Study | Perspective | Time horizon | Interventions and comparators | Target population | Data sources | Cost inclusions | Sensitivity analysis | Discounting | Validation |
| --- | --- | --- | --- | --- | --- | --- | --- | --- | --- |
| Mountain et al.(2023)32 | 1 | 1 | 1 | 1 | 1 | 1 | 1 | 1 | 1 |
